# Supplementary material for: Is Satisfaction with Online Learning Related to Depression, Anxiety, and Insomnia Symptoms? A Cross-Sectional Study on Medical Undergraduates in Romania
Source: Eur J Investig Health Psychol Educ. 2023 Mar 10;13(3):580–94. doi: 10.3390/ejihpe13030045 (PMC10046999; doi:10.3390/ejihpe13030045)
Supplement: Supplementary file 1 [file ejihpe-13-00045-s001.zip › ejihpe-2216675-supplementary.pdf]

Table S1 (Supplementary Materials- All the scales used in the study)

- Patient Health Questionnaire (PHQ-9).

| Over the <b>last 2 weeks</b> , how often have you been bothered by any of the following problems? (Use “✓” to indicate your answer)                                         | Not at all | Several days | More than half the days | Nearly every day |
|-----------------------------------------------------------------------------------------------------------------------------------------------------------------------------|------------|--------------|-------------------------|------------------|
| 1. Little interest or pleasure in doing things                                                                                                                              | 0          | 1            | 2                       | 3                |
| 2. Feeling down, depressed, or hopeless                                                                                                                                     | 0          | 1            | 2                       | 3                |
| 3. Trouble falling or staying asleep, or sleeping too much                                                                                                                  | 0          | 1            | 2                       | 3                |
| 4. Feeling tired or having little energy                                                                                                                                    | 0          | 1            | 2                       | 3                |
| 5. Poor appetite or overeating                                                                                                                                              | 0          | 1            | 2                       | 3                |
| 6. Feeling bad about yourself — or that you are a failure or have let yourself or your family down                                                                          | 0          | 1            | 2                       | 3                |
| 7. Trouble concentrating on things, such as reading the newspaper or watching television                                                                                    | 0          | 1            | 2                       | 3                |
| 8. Moving or speaking so slowly that other people could have noticed? Or the opposite — being so fidgety or restless that you have been moving around a lot more than usual | 0          | 1            | 2                       | 3                |
| 9. Thoughts that you would be better off dead or of hurting yourself in some way                                                                                            | 0          | 1            | 2                       | 3                |

- Generalized Anxiety Disorder-7 (GAD-7)

| Over the last 2 weeks, how often have you been bothered by the following problems? | Not at all sure | Several days | Over half the days | Nearly every day |
|------------------------------------------------------------------------------------|-----------------|--------------|--------------------|------------------|
| 1. Feeling nervous, anxious, or on edge                                            | 0               | 1            | 2                  | 3                |
| 2. Not being able to stop or control worrying                                      | 0               | 1            | 2                  | 3                |
| 3. Worrying too much about different things                                        | 0               | 1            | 2                  | 3                |

|                                                      |   |   |   |   |
|------------------------------------------------------|---|---|---|---|
| 4. Trouble relaxing                                  | 0 | 1 | 2 | 3 |
| 5. Being so restless that it's hard to sit still     | 0 | 1 | 2 | 3 |
| 6. Becoming easily annoyed or irritable              | 0 | 1 | 2 | 3 |
| 7. Feeling afraid as if something awful might happen | 0 | 1 | 2 | 3 |
| <i>Add the score for each column</i>                 |   |   |   |   |
| <i>Total Score (add your column scores) =</i>        |   |   |   |   |

- Insomnia Severity Index (ISI)

1. Please rate the current (i.e., last week) **SEVERITY** of your insomnia problem(s).

|                              |   |             |  |         |  |       |  |          |  |
|------------------------------|---|-------------|--|---------|--|-------|--|----------|--|
| 90-120                       |   | >120        |  | <30 min |  | 30-45 |  | 45-90    |  |
|                              |   |             |  | None    |  | Mild  |  | Moderate |  |
| <u>Severe</u>                |   | <u>Very</u> |  |         |  |       |  |          |  |
| Difficulty falling asleep:   |   | 0           |  | 1       |  | 2     |  |          |  |
| 3                            | 4 |             |  |         |  |       |  |          |  |
| Difficulty staying asleep:   |   | 0           |  | 1       |  | 2     |  |          |  |
| 3                            | 4 |             |  |         |  |       |  |          |  |
| Problem waking up too early: |   | 0           |  | 1       |  | 2     |  |          |  |
| 3                            | 4 |             |  |         |  |       |  |          |  |

2. How **SATISFIED**/dissatisfied are you with your current sleep pattern?

|                       |   |   |   |                          |  |  |  |
|-----------------------|---|---|---|--------------------------|--|--|--|
| <u>Very Satisfied</u> |   |   |   | <u>Very Dissatisfied</u> |  |  |  |
| 0                     | 1 | 2 | 3 | 4                        |  |  |  |

3. To what extent do you consider your sleep problem to **INTERFERE** with your daily functioning (e.g. daytime fatigue, ability to function at work/daily chores, concentration, memory, mood, etc.).

|             |             |          |      |           |
|-------------|-------------|----------|------|-----------|
| Not at all  | A Little    | Somewhat | Much | Very Much |
| Interfering | Interfering |          |      |           |

0                      1                      2                      3                      4

4. How **NOTICEABLE** to others do you think your sleeping problem is in terms of impairing the quality of your life?

Not at all                      Barely    Somewhat                      Much                      Very Much  
Noticeable                      Noticeable

0                      1                      2                      3                      4

5. How **WORRIED**/distressed are you about your current sleep problem?

Not at all    A Little                      Somewhat    Much                      Very Much

0                      1                      2                      3                      4

- The perception of online learning satisfaction was assessed with a 20-item questionnaire which was used based on sections I to IV of the Dundee Ready Education Environment Measure (DREEM)

## Online Learning & Medical Education

4. Prior to the Covid-19 pandemic, which online learning platforms/resources did you engage with? (Please select all which apply)

☐ Video tutorials e.g. Youtube/Osmosis

☐ Live tutorials via Zoom/similar platforms by **Medical School**

☐ Live tutorials via Zoom/similar platforms by **other sources**

☐ Online question banks

☐ Online/Digital Flashcards e.g. Brainscape, Anki

☐ Pre-recorded tutorials via Medical School specific online learning platform

☐ None

☐ Other - please specify

5. Which method of online learning do you find the most effective? Please rank the following methods from 1-5 (1=most effective, 5=least effective)

Video tutorials e.g. Youtube/Osmosis

Live tutorials via Zoom/similar platforms

Online question banks

Online/Digital Flashcards e.g. Brainscape, Anki

Other - please specify:

6. Prior to the Covid-19 pandemic, how many hours per week did you spend on average on online learning?

7. During the current Covid-19 pandemic, how has your medical school adapted teaching for your year? (Please select all which apply)

☐ Introduced a new online learning platform with new resources

☐ Introduced new resources to an existing online learning platform

☐ Delivered live tutorials via Zoom/similar platforms

☐ Delivered pre-recorded tutorials

☐ Other - please specify:

8. Are these online teaching sessions interactive?

☐ Yes

☐ No

☐ Majority are

☐ Majority are not

8b. What makes your teaching sessions interactive? (Please select all which apply)

☐ Opportunity to interact via chat box

☐ Opportunity to interact via speech

☐ Live quiz

☐ Other - please specify:

9. Does the online learning follow a pre-set curriculum, or is it based on student requests?

☒ Pre-set curriculum  
☐ Student requests  
☐ Combination of both

10. During the current Covid-19 pandemic, how many hours per week do you spend on average on online learning?

### Student Perceptions of Online Learning

11. Please rank the following statements on your experience of online learning from 1-5 (1=Strongly disagree, 5 = Strongly agree)

0 1 2 3 4 5

The teaching is often stimulating

☐

I find it easy to engage in the lesson

☐

I feel able to ask the questions I want

☐

I enjoy the online teaching

☐

I would like the online teaching to be more interactive

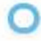

I feel that online teaching is as effective as face-face teaching

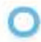

I prefer online teaching to face-face teaching

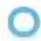

The teachers are well prepared for the teaching sessions

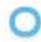

I feel I am being well prepared for my profession

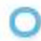

My internet connection can be problematic

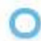

12. What aspects of online learning do you enjoy? (Please select all which apply)

☐ No travel

☐ Ability to ask questions

☐ Cost savings

☐ More comfortable

☐ Interactive

☐ Ability to learn at own pace

☐ Flexibility

☐ Other – please specify:

13. What do you feel are the barriers to online learning? (Please select all which apply)

☐ Internet connection

☐ Lack of space

☐ Timing of tutorials

☐ Lack of devices

☐ Family distractions

☐ Anxiety

☐ Other – please specify:

### Role of Online Learning in Clinical Teaching

14a. Do you feel online learning has successfully replaced the clinical teaching you receive from direct patient contact?

- ☒ Yes
- ☐ No
- ☐ Yes, to some extent
- ☐ N/A

14b. Do you feel able to learn practical clinical skills through online learning?

- ☒ Yes
- ☐ No
- ☐ Yes, to some extent
- ☐ N/A

15. Have your examinations been affected by Covid-19?

☐ Yes

☐ No

☐ N/A

- provided information about the average number of hours spent online for studying, doing job or internship-related work, watching TV, using social media, watching video classes, reading, doing research or schoolwork, time spent playing video games on games console, computer, television, tablet, smartphone

On a typical day, how much time do you spend studying, watching video classes, reading, doing research or school work on a computer, television, tablet, smartphone?

On a typical day, how much time do you spend studying in total?

On a typical day, how much time do you spend doing job or internship-related work on a computer, television, tablet, smartphone?

On a typical day, how much time do you spend watching TV shows, movies, soap operas, news, sports, programs, Twitch, podcasts or other videos on a computer, television, tablet, smartphone

On a typical day, how much time do you spend playing video games on a games console, computer, television, tablet, smartphone

On a typical day, how much time do you spend using social media like Facebook, Instagram, Twitter, Snapchat, or chat applications like WhatsApp, Telegram, Messenger on a computer, television, tablet, smartphone

Responses: 0-30 minutes, 1-3 hours, >3 hours
